# Supplementary material for: Finite Element Analysis in the Balancing Phase for an Open Source Transfemoral Prosthesis with Magneto-Rheological Damper
Source: MDPI journal article supplement (doi:10.3390/inventions8010036), 2023-01-31
Supplement: s1 [file s1]

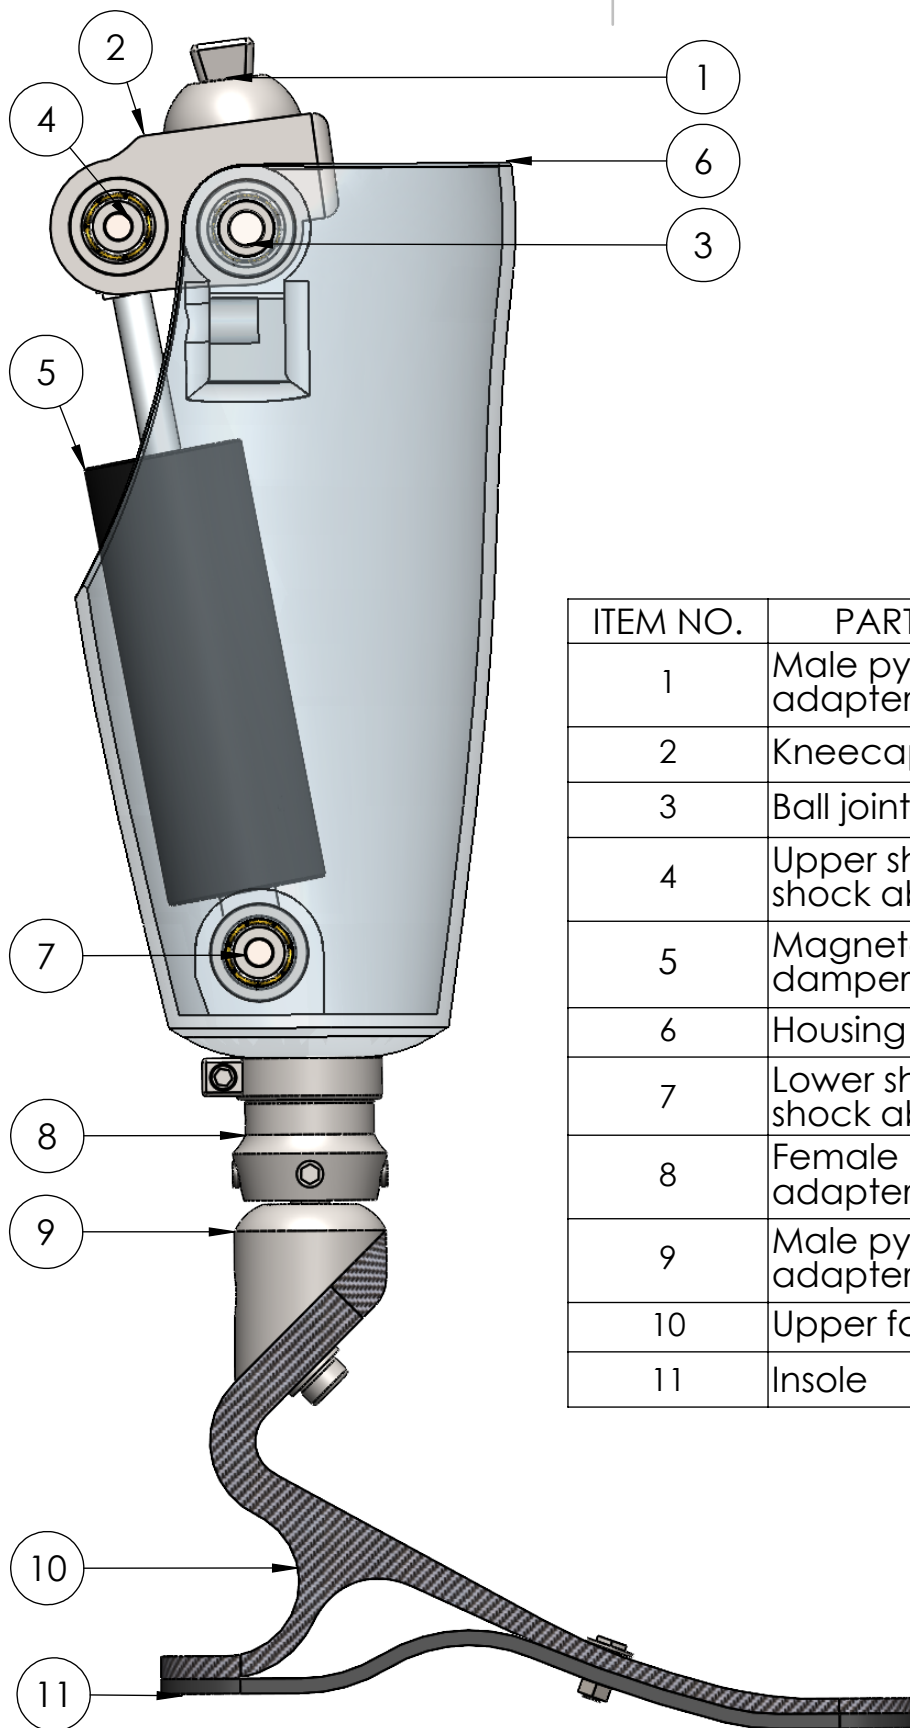

| ITEM NO. | PART NUMBER                        | QTY |
|----------|------------------------------------|-----|
| 1        | Male pyramidal adapter with thread | 1   |
| 2        | Kneecap                            | 1   |
| 3        | Ball joint shaft                   | 1   |
| 4        | Upper shaft of the shock absorber  | 1   |
| 5        | Magnetorheological damper          | 1   |
| 6        | Housing shell                      | 1   |
| 7        | Lower shaft of the shock absorber  | 1   |
| 8        | Female pyramidal adapter           | 1   |
| 9        | Male pyramidal adapter             | 1   |
| 10       | Upper foot                         | 1   |
| 11       | Insole                             | 1   |

TITLE:  
Transfemoral prosthesis

MASS:  
2282.73 g

MATERIAL:

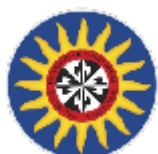

UNIVERSIDAD SANTO TOMÁS  
FACULTAD DE INGENIERÍA Y CIENCIAS EXACTAS  
BOGOTÁ

PROJECT:  
TRANSFEMORAL MECHATRONIC PROSTHESIS  
WITH MAGNETORHEOLOGICAL  
COMPENSATION

DRAWN:  
ZULY ALEXANDRA MORA PEREZ  
SEBASTIAN MUÑOZ VASQUEZ

UNITS: mm  
SCALE: 1:2  
DATE: 29/09/2020  
DWG. NO. 1/11  
QUANTITY: 1  
SHEET 1 OF 1

A4

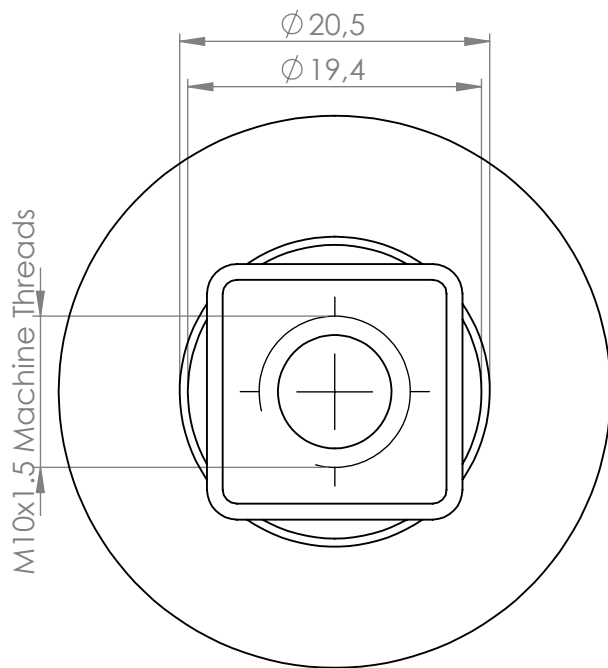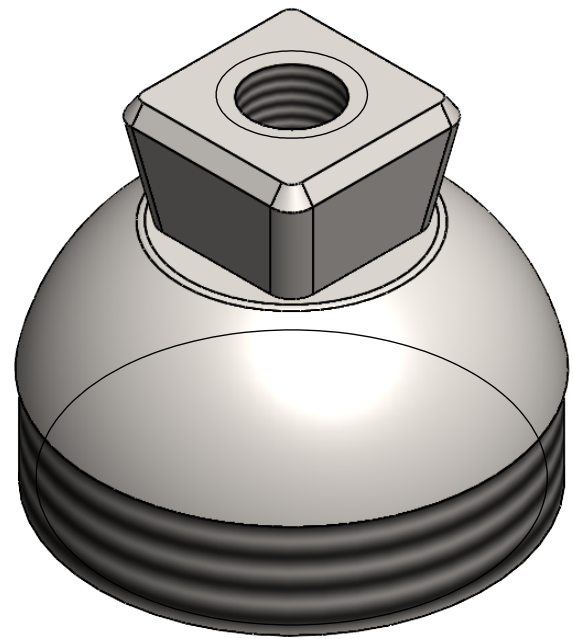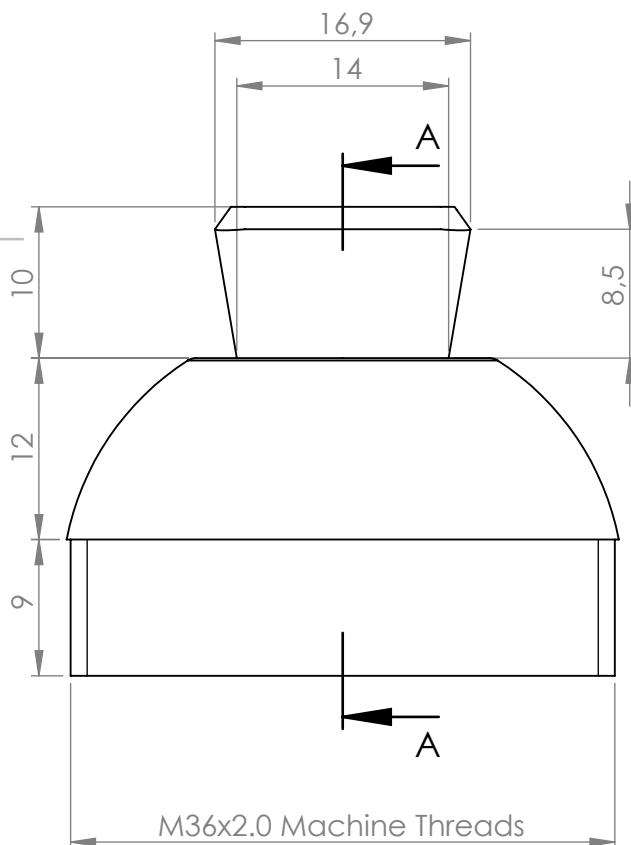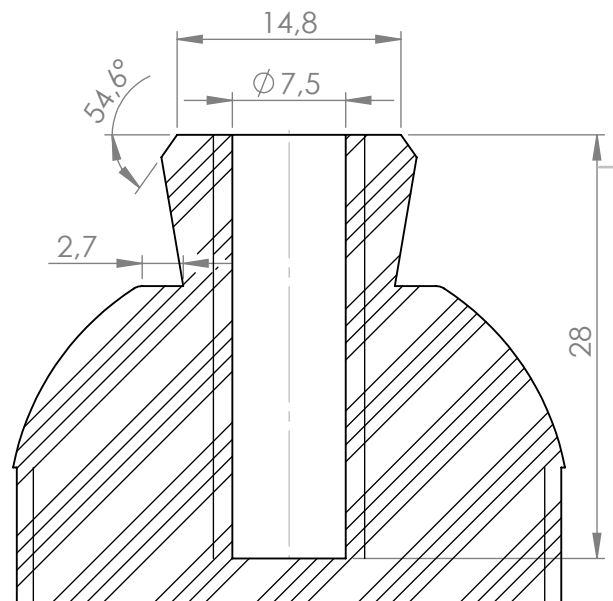

SECTION VIEW A-A  
SCALE 2 : 1

TITLE:  
Male pyramidal adapter with thread

MASS:  
142 g

MATERIAL:  
304 Stainless steel

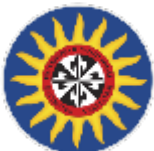

UNIVERSIDAD SANTO TOMÁS  
FACULTAD DE INGENIERÍA Y CIENCIAS EXACTAS  
BOGOTÁ

PROJECT:  
TRANSFEMORAL MECHATRONIC PROSTHESIS  
WITH MAGNETORHEOLOGICAL  
COMPENSATION

DRAWN:  
ZULY ALEXANDRA MORA PEREZ  
SEBASTIAN MUÑOZ VASQUEZ

UNITS: mm  
SCALE: 2:1  
DATE: 29/09/2020  
DWG. NO.: 2/11  
QUANTITY: 1  
SHEET 1 OF 1

A4

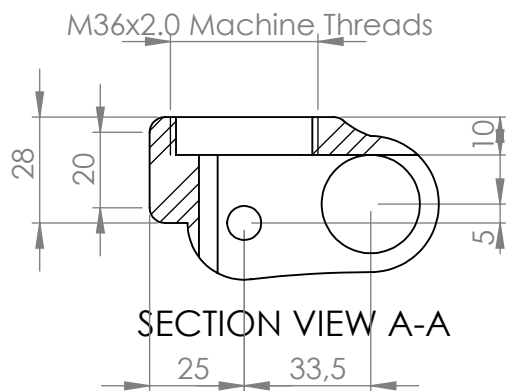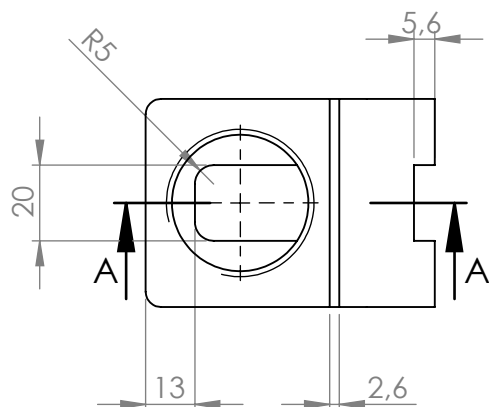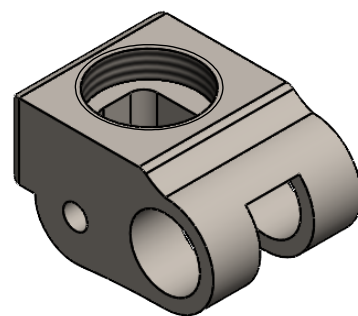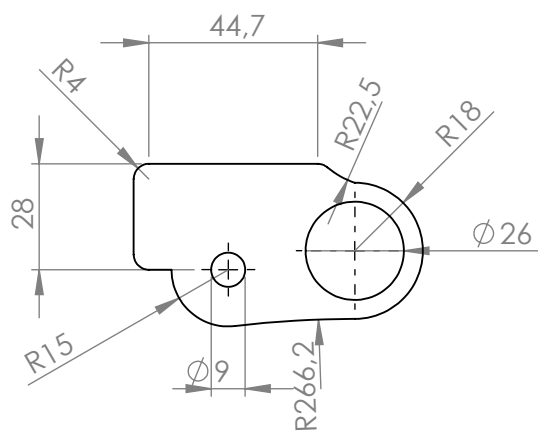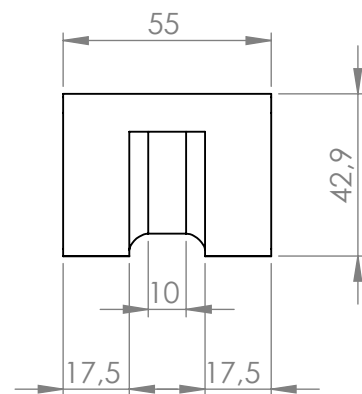

TITLE:

Kneecap

MASS:

660 g

MATERIAL:

304 Stainless steel

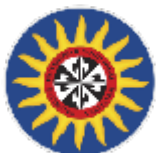

UNIVERSIDAD SANTO TOMÁS  
PRIMER CENITRO UNIVERSITARIO DE COLOMBIA  
BUCARA RAMA

PROJECT:

TRANSFEMORAL MECHATRONIC PROSTHESIS  
WITH MAGNETORHEOLOGICAL  
COMPENSATION

DRAWN:

ZULY ALEXANDRA MORA PEREZ  
SEBASTIAN MUÑOZ VASQUEZ

UNITS: mm

SCALE: 1:2

DATE: 29/09/2020

DWG. NO. 3/11

QUANTITY: 1

SHEET 1 OF 1

A4

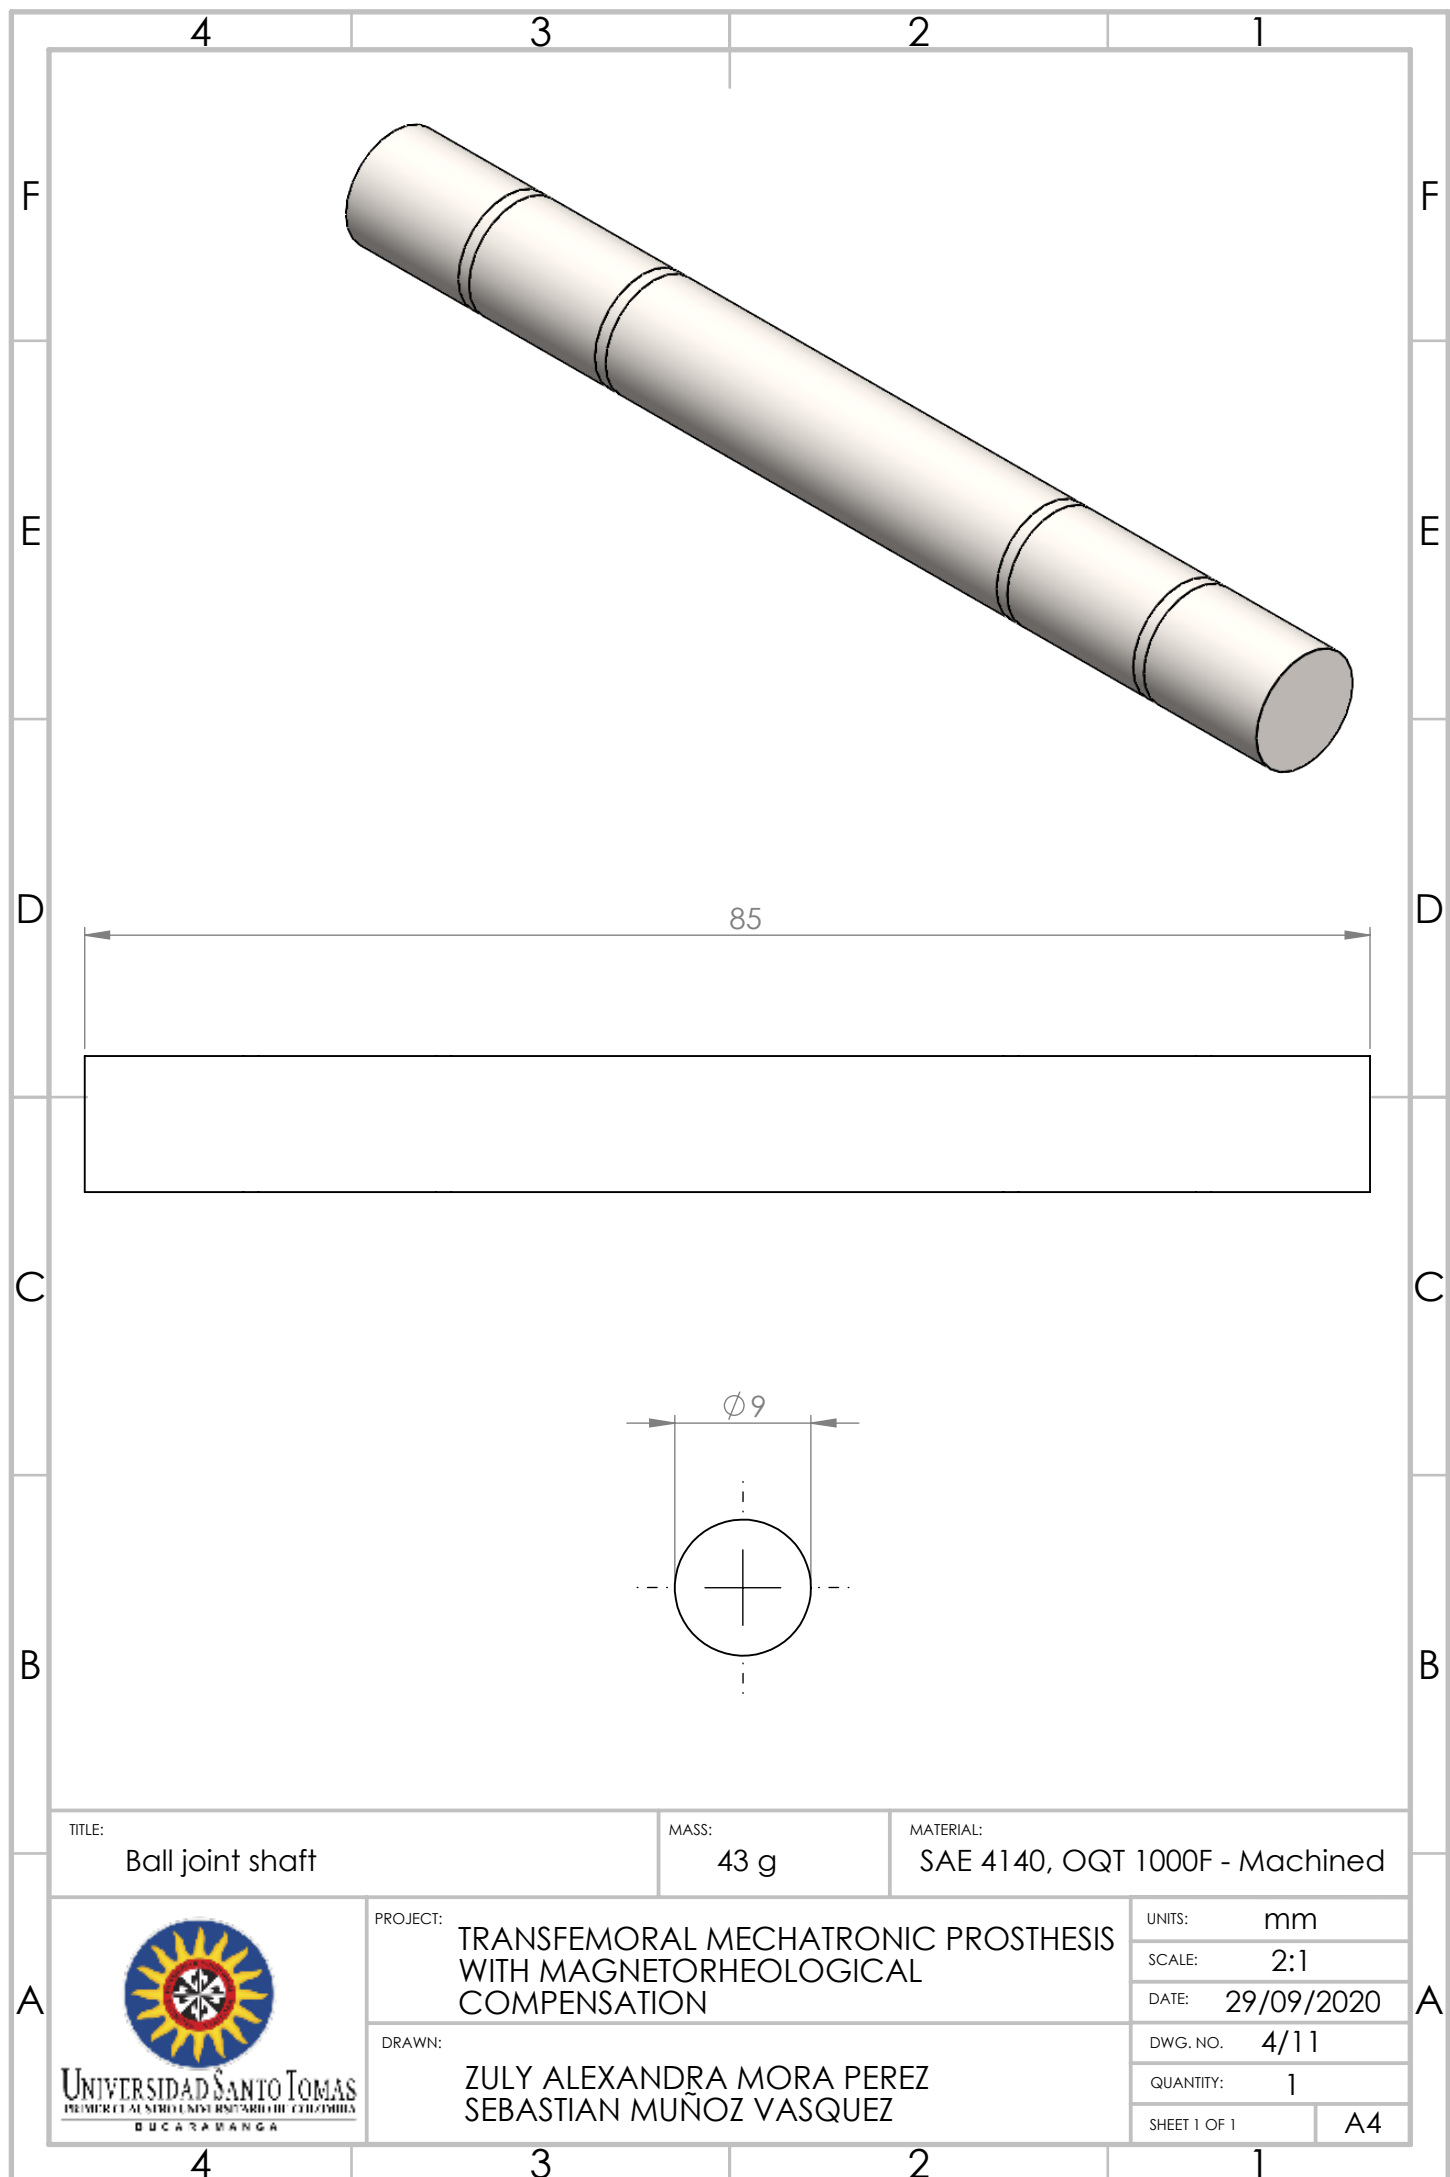

|        |                  |       |      |           |                                |
|--------|------------------|-------|------|-----------|--------------------------------|
| TITLE: | Ball joint shaft | MASS: | 43 g | MATERIAL: | SAE 4140, OQT 1000F - Machined |
|--------|------------------|-------|------|-----------|--------------------------------|

|                                                                                                                                                                                                        |          |                                                                                |  |              |            |
|--------------------------------------------------------------------------------------------------------------------------------------------------------------------------------------------------------|----------|--------------------------------------------------------------------------------|--|--------------|------------|
| <br><b>UNIVERSIDAD SANTO TOMÁS</b><br><small>PRIMER CENAL SUR UNIVERNARIO DE COLOMBIA</small><br><b>BUCARAMANGA</b> | PROJECT: | TRANSFEMORAL MECHATRONIC PROSTHESIS<br>WITH MAGNETORHEOLOGICAL<br>COMPENSATION |  | UNITS:       | mm         |
|                                                                                                                                                                                                        | DRAWN:   | ZULY ALEXANDRA MORA PEREZ<br>SEBASTIAN MUÑOZ VASQUEZ                           |  | SCALE:       | 2:1        |
|                                                                                                                                                                                                        |          |                                                                                |  | DATE:        | 29/09/2020 |
|                                                                                                                                                                                                        |          |                                                                                |  | DWG. NO.     | 4/11       |
|                                                                                                                                                                                                        |          |                                                                                |  | QUANTITY:    | 1          |
|                                                                                                                                                                                                        |          |                                                                                |  | SHEET 1 OF 1 | A4         |

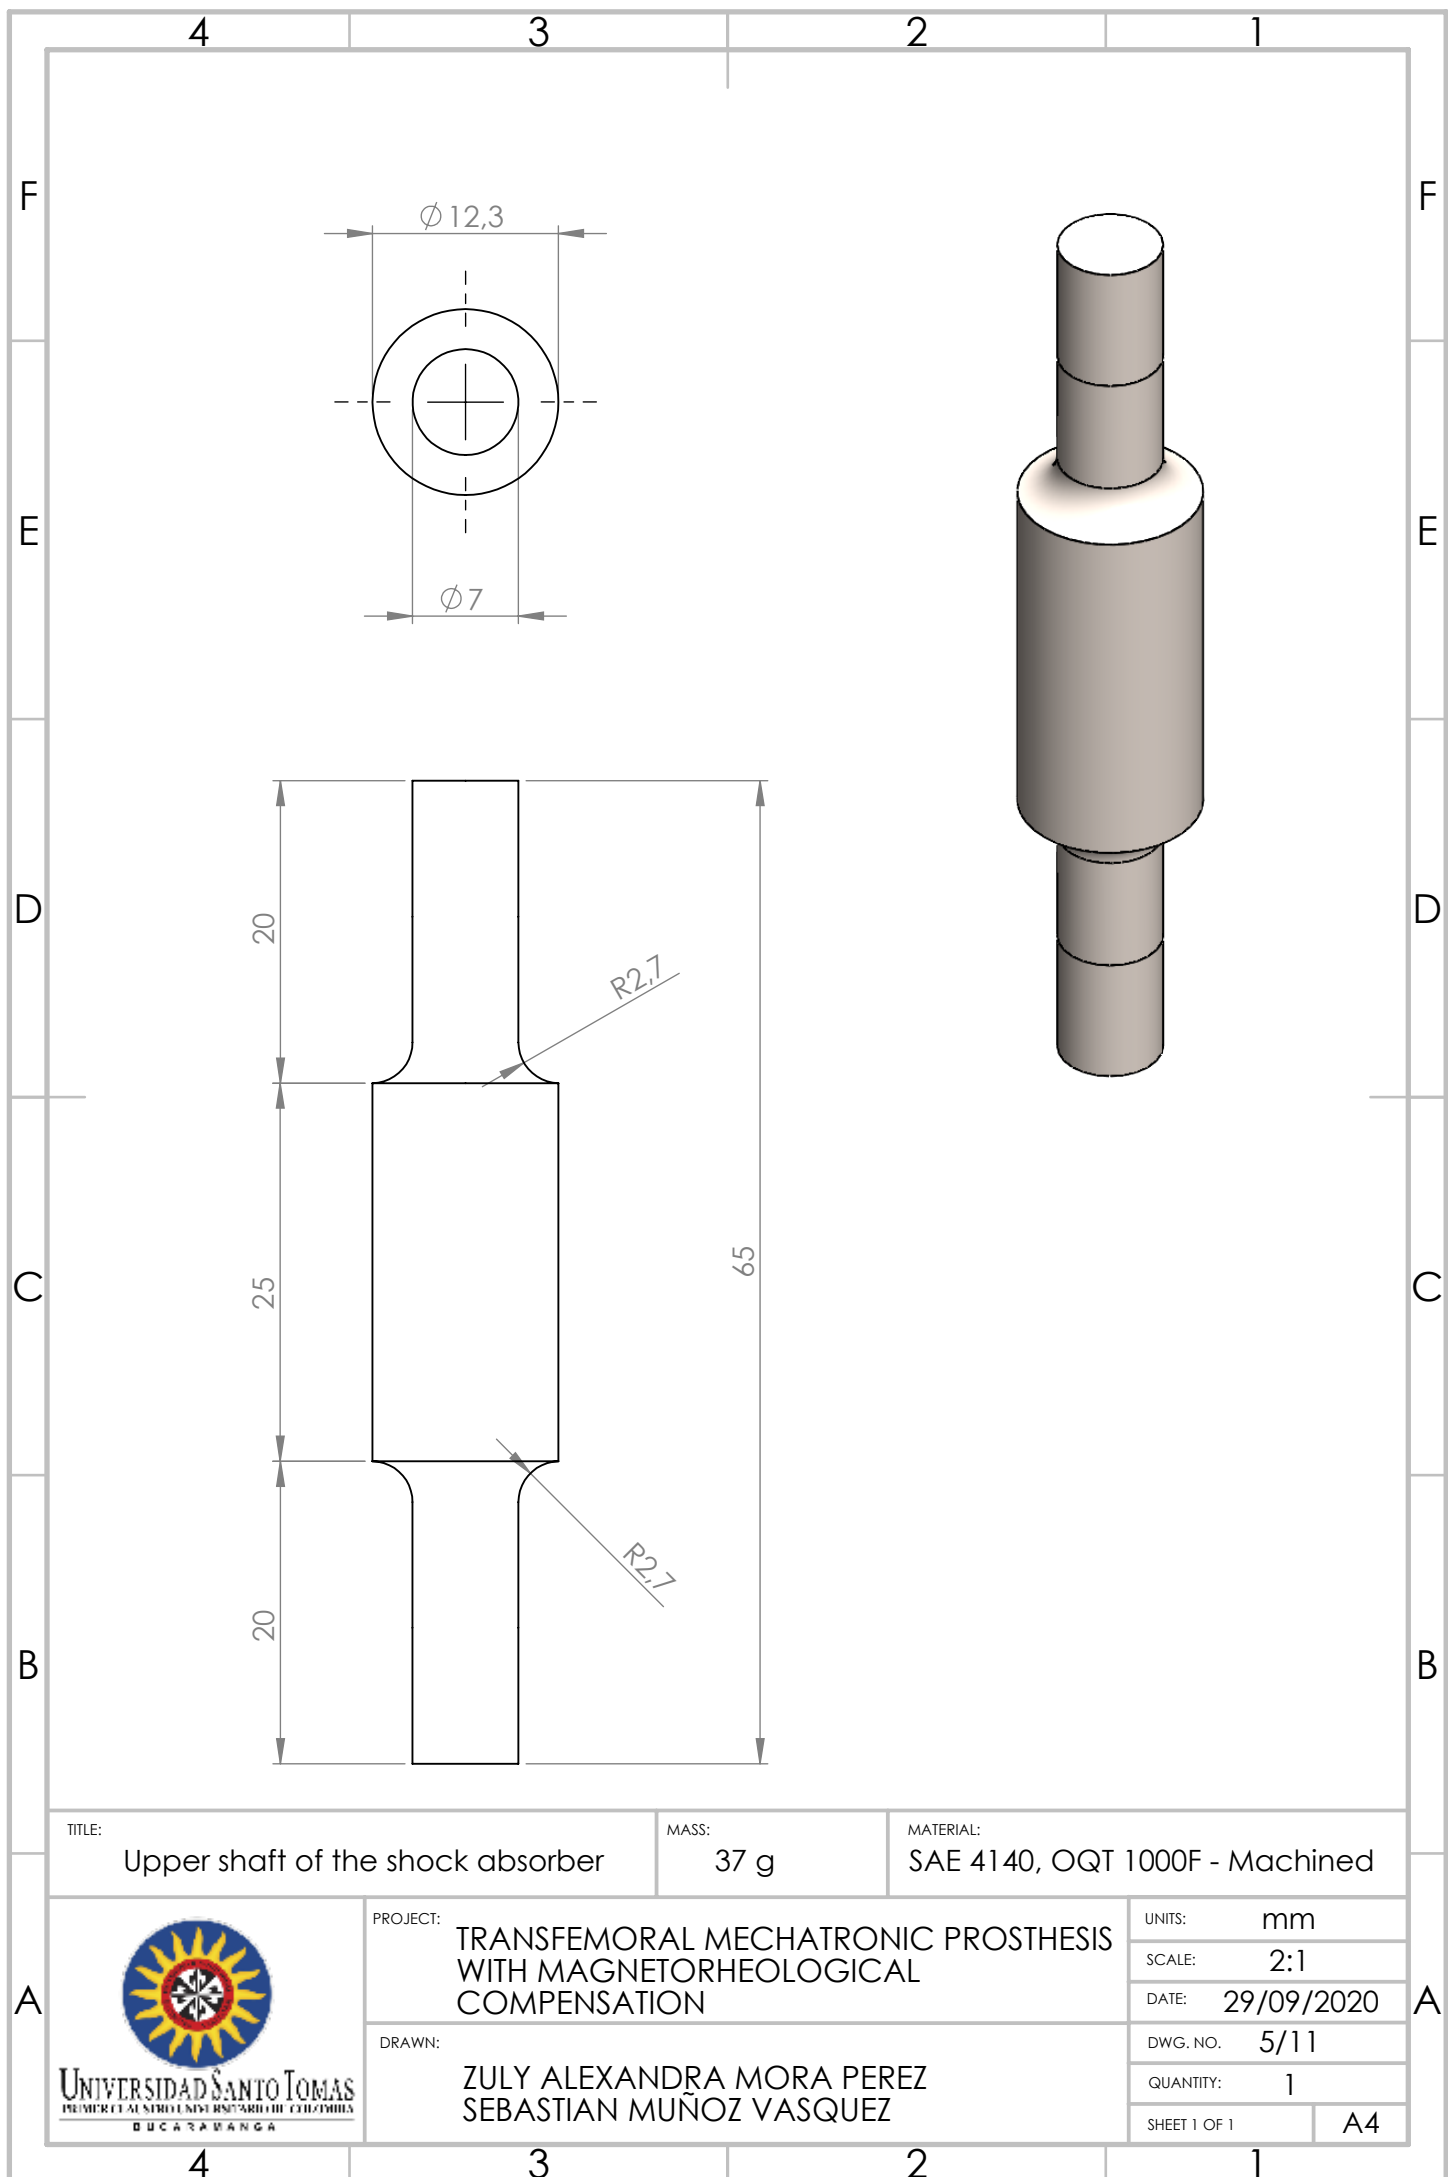

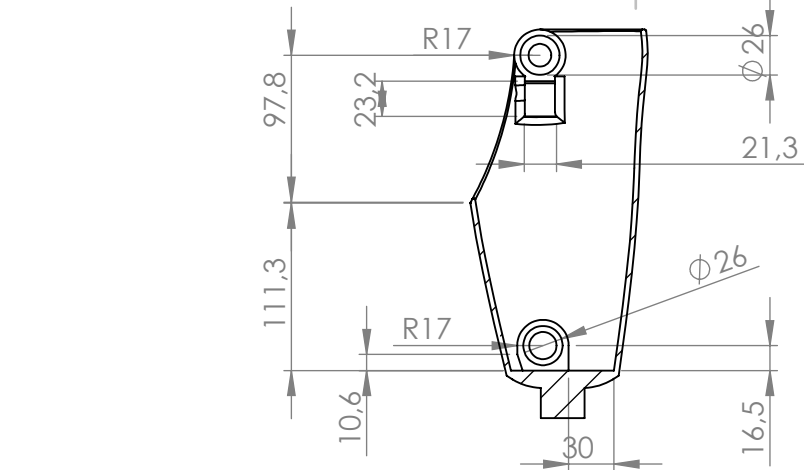

SECTION VIEW B-B

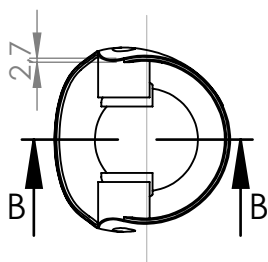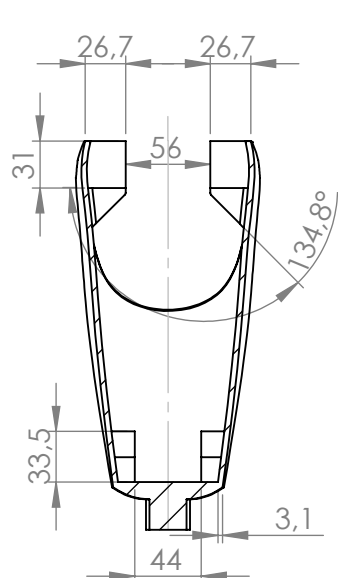

SECTION VIEW A-A

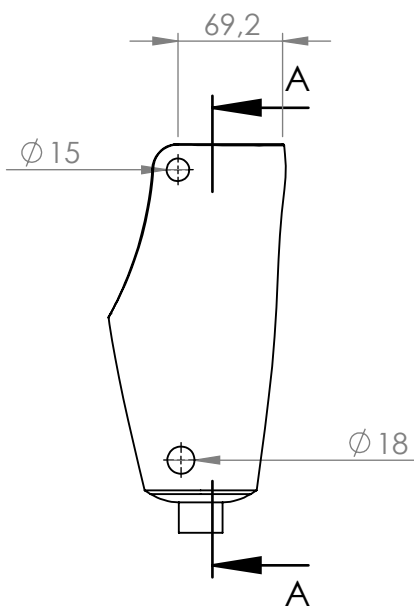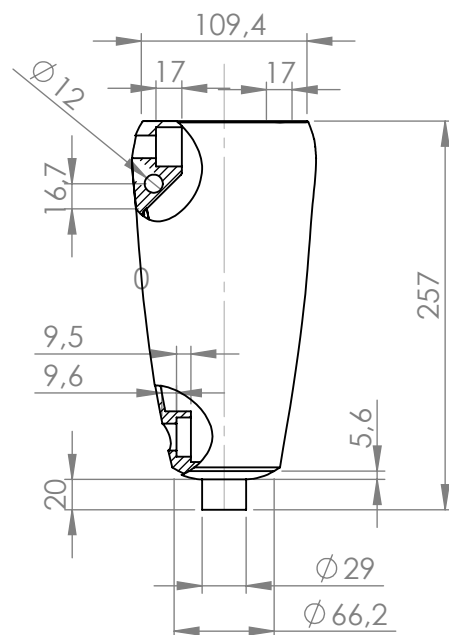

TITLE: Housing shell

MASS: 470.52 g

MATERIAL: Laminated composite. GRC.

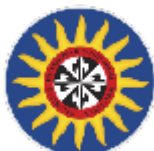

UNIVERSIDAD SANTO TOMÁS  
PRIMER CENITRO UNIVERSITARIO DE COLOMBIA  
BUCARANGA

PROJECT: TRANSFEMORAL MECHATRONIC PROSTHESIS  
WITH MAGNETORHEOLOGICAL  
COMPENSATION

DRAWN

ZULY ALEXANDRA MORA PEREZ  
SEBASTIAN MUÑOZ VASQUEZ

UNITS: mm

SCALE: 1:5

DATE: 29/09/2020

DWG. NO. 6/11

QUANTITY: 1

SHEET 1 OF 1

A4

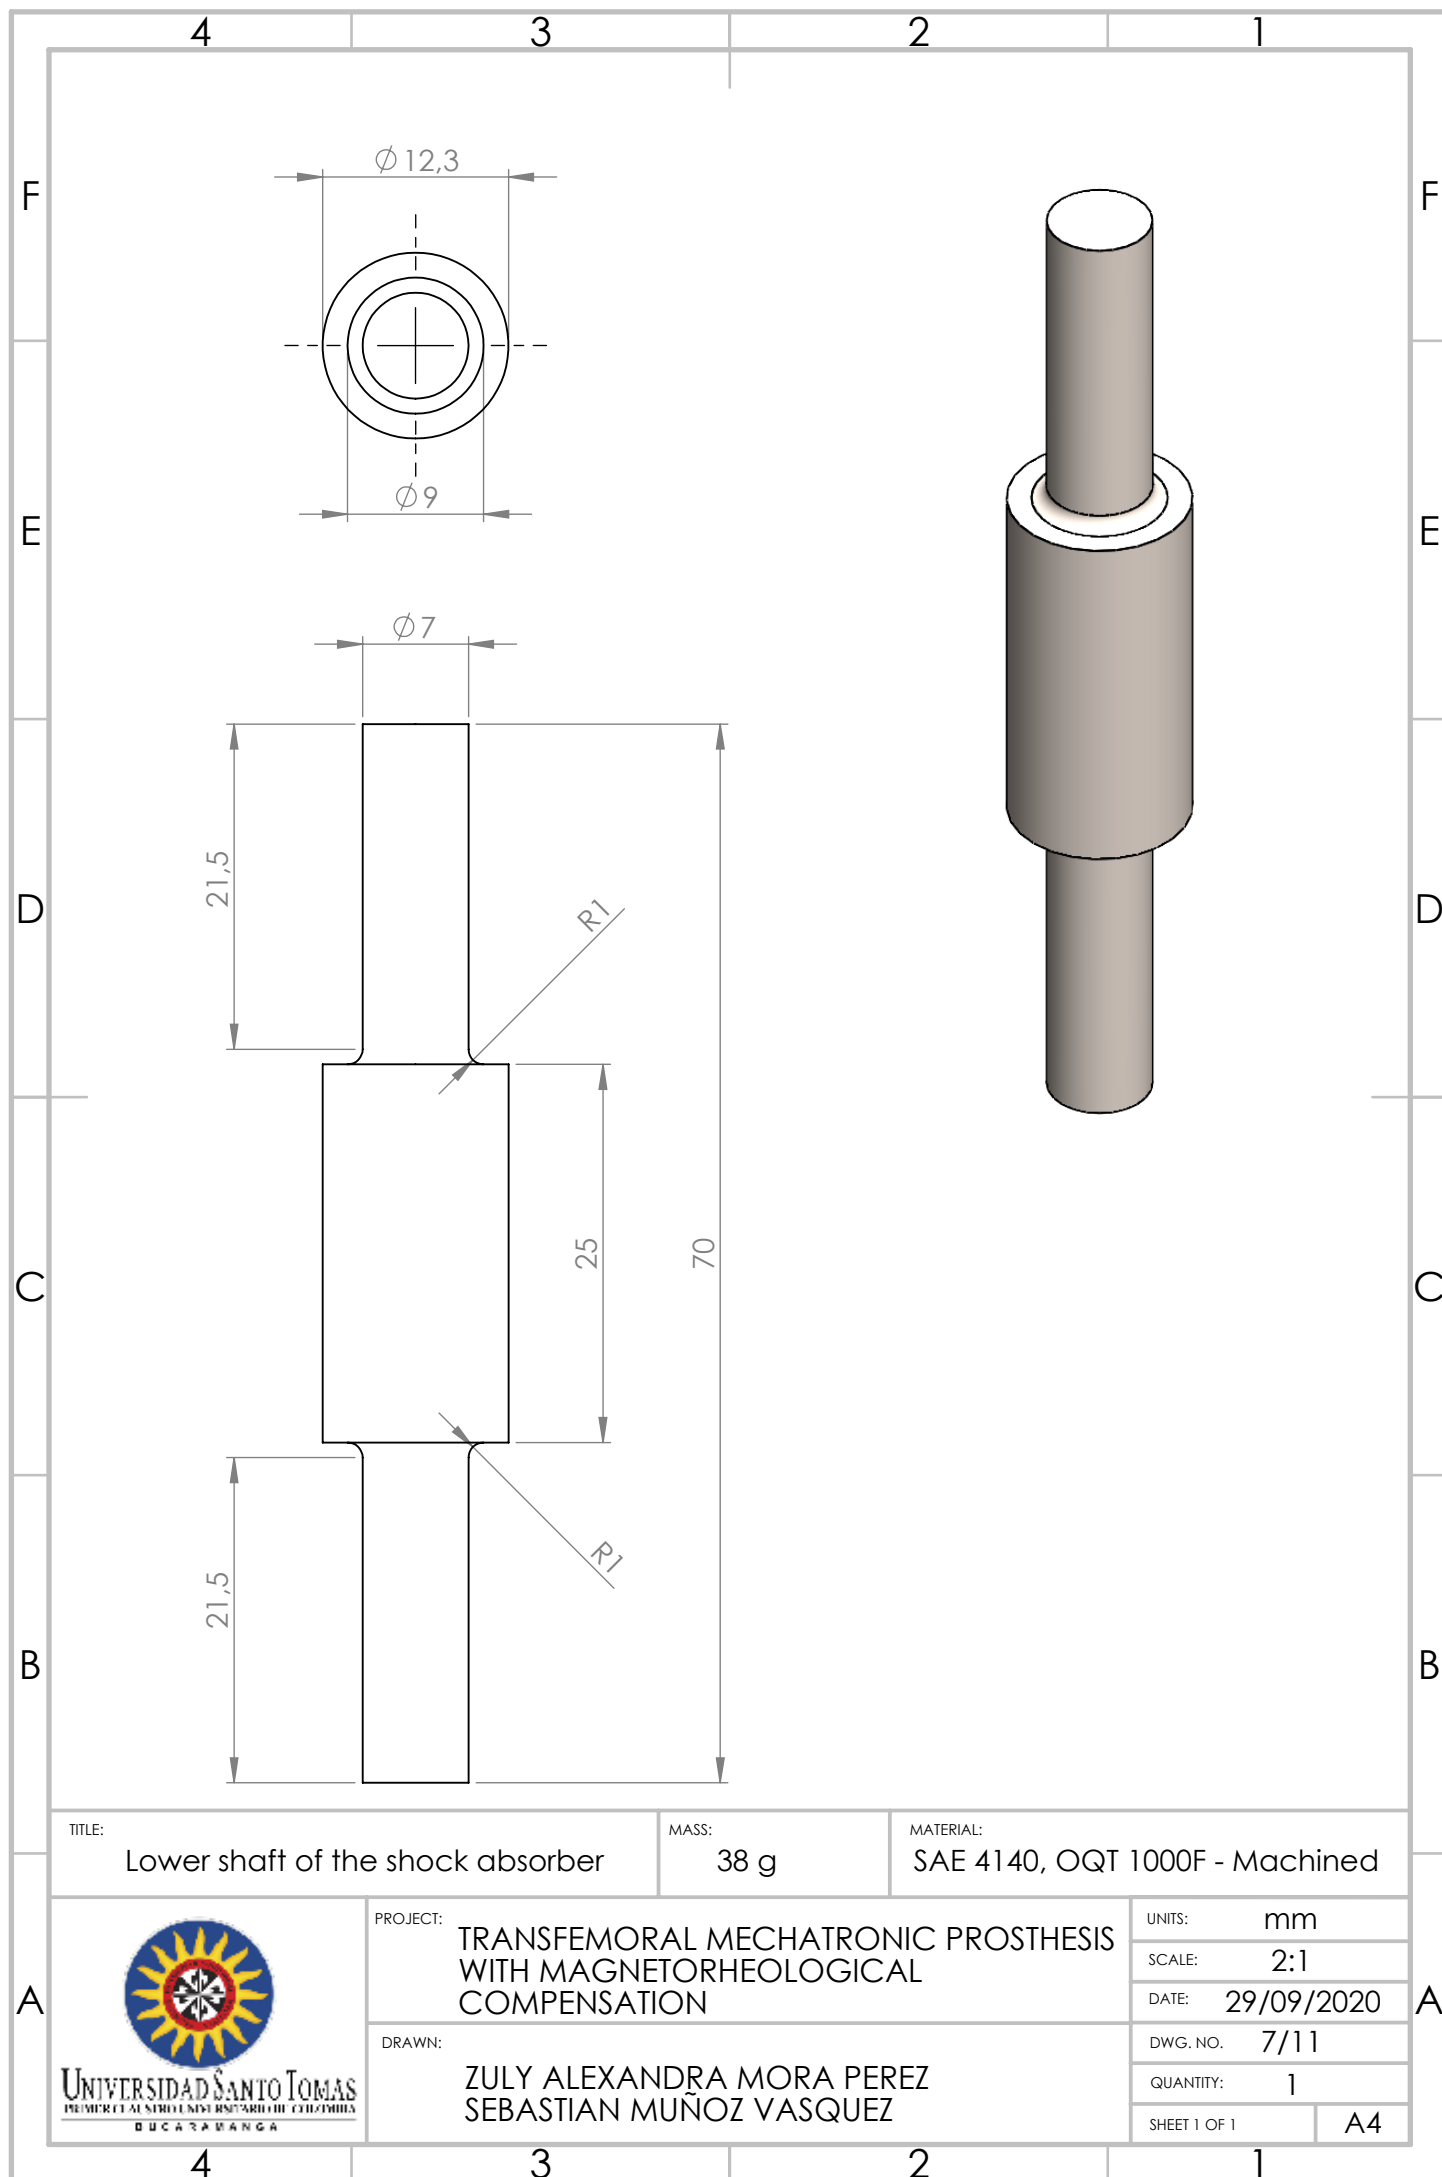

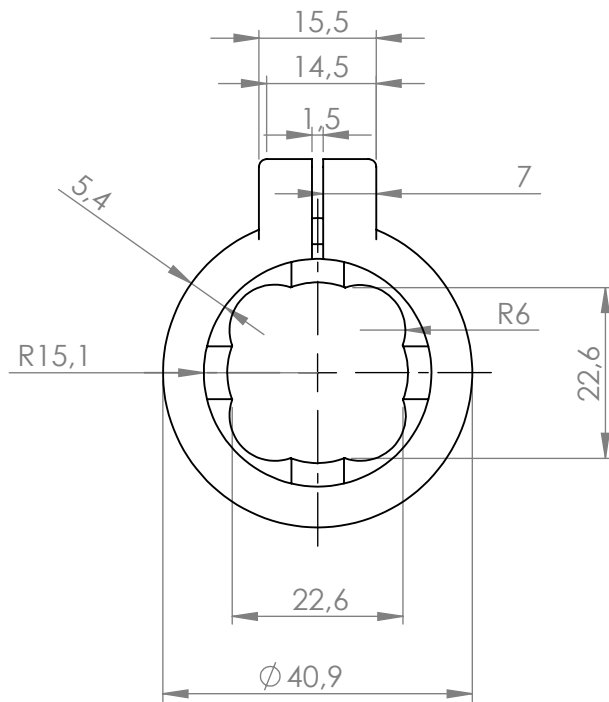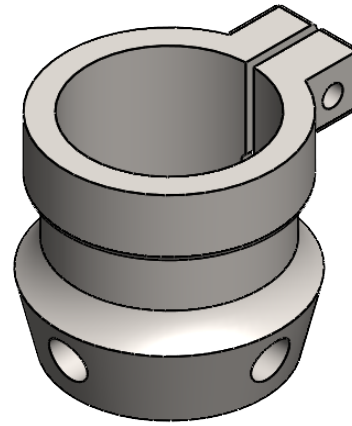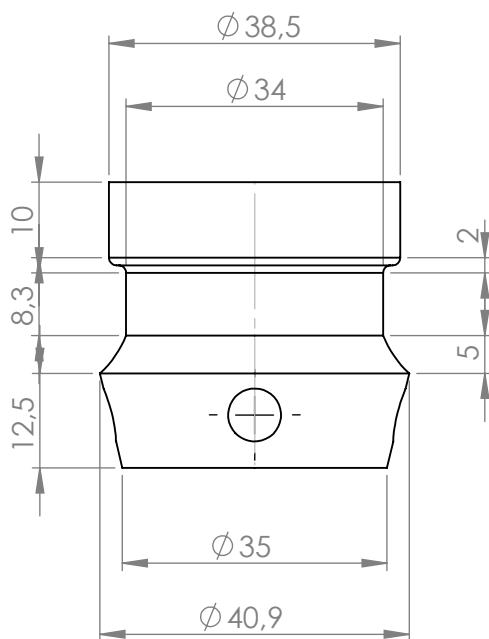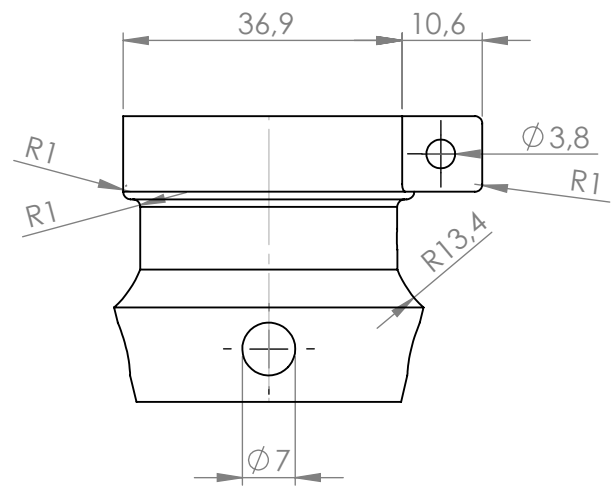

TITLE: Female pyramidal adapter

MASS: 121 g

MATERIAL: 304 Stainless steel



UNIVERSIDAD SANTO TOMÁS  
PRIMER CENAL SURLENTINO EN EL MUNDO  
BUCARANGA

PROJECT: TRANSFEMORAL MECHATRONIC PROSTHESIS  
WITH MAGNETORHEOLOGICAL  
COMPENSATION

DRAWN: ZULY ALEXANDRA MORA PEREZ  
SEBASTIAN MUÑOZ VASQUEZ

UNITS: mm  
SCALE: 1:1  
DATE: 29/09/2020  
DWG. NO. 8/11  
QUANTITY: 1  
SHEET 1 OF 1

A4



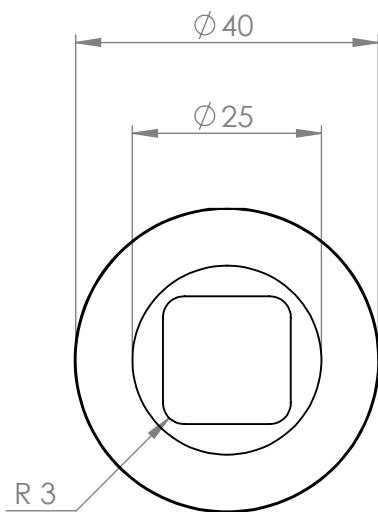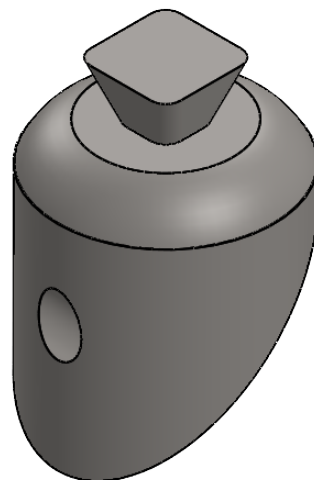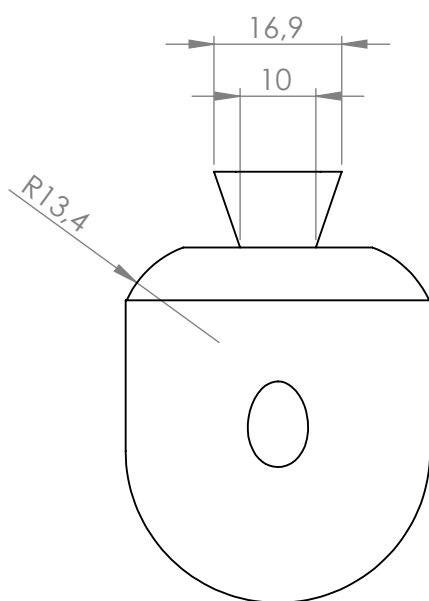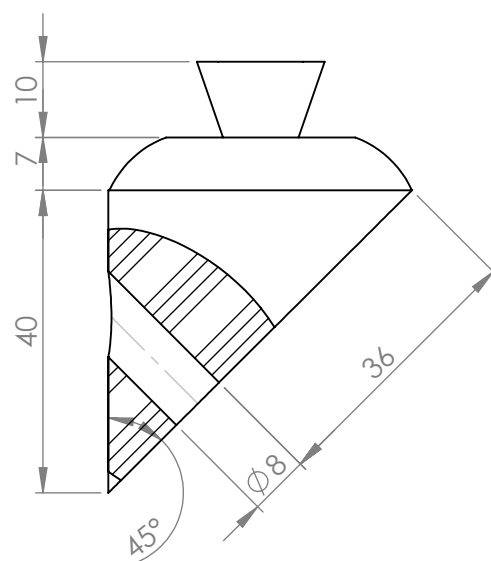

TITLE: Male pyramidal adapter

MASS: 262 g

MATERIAL: 304 Stainless steel

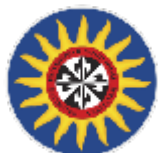

UNIVERSIDAD SANTO TOMÁS  
PRINCIPAL STREET, BUCARAMANGA

PROJECT: TRANSFEMORAL MECHATRONIC PROSTHESIS  
WITH MAGNETORHEOLOGICAL  
COMPENSATION

DRAWN: ZULY ALEXANDRA MORA PEREZ  
SEBASTIAN MUÑOZ VASQUEZ

UNITS: mm

SCALE: 1:1

DATE: 29/09/2020

DWG. NO. 9/11

QUANTITY: 1

SHEET 1 OF 1

A4

Printing parameters:  
 Printed on Markforged Two®  
 Matrix: Onyx®  
 Reinforcement: carbon fiber  
 Infill: 100% solid  
 Fiber orientation: concentric  
 Fiber volume fraction: 32%

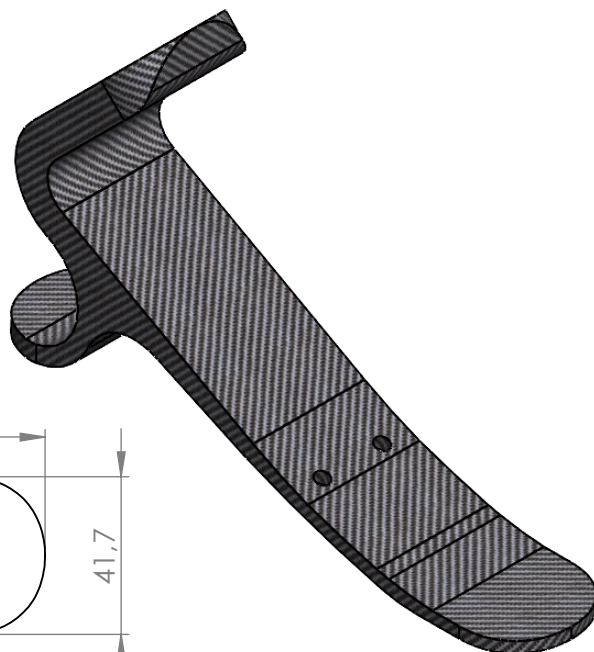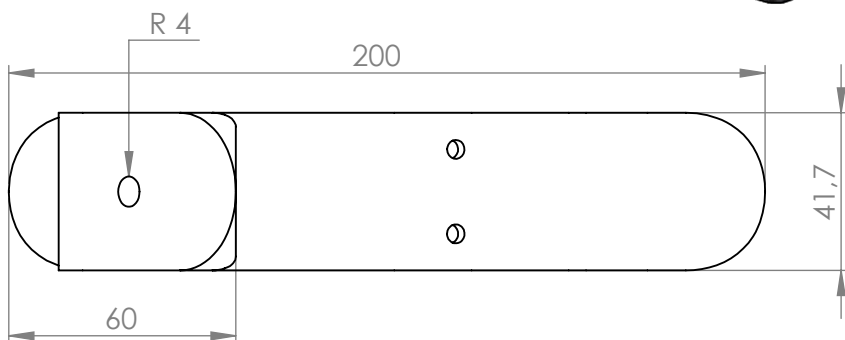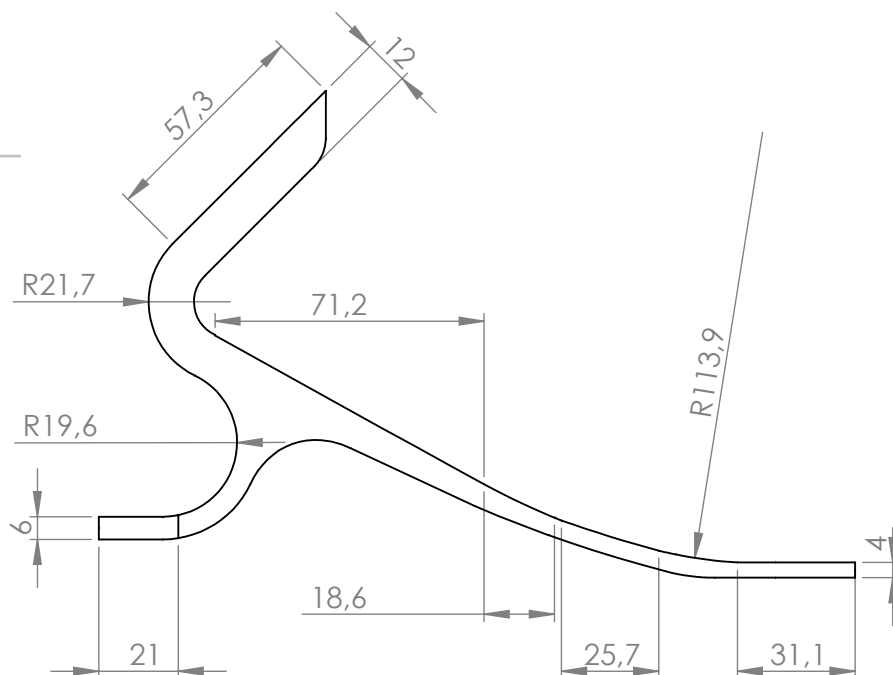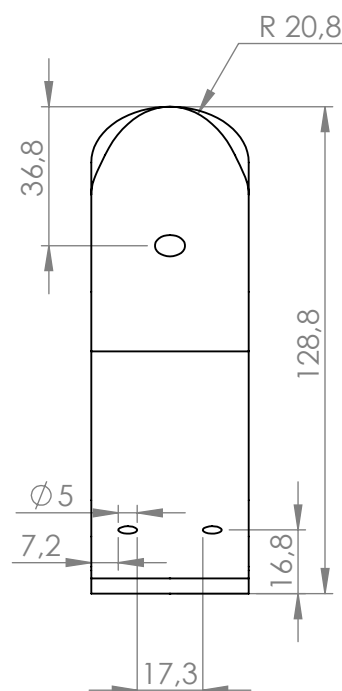

TITLE:  
Upper foot

MASS:  
112.29 g

MATERIAL:  
Carbon fiber and onyx composite

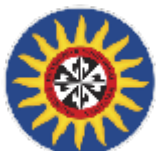

UNIVERSIDAD SANTO TOMÁS  
 PRIMER CENITRO UNIVERSITARIO DE COLOMBIA  
 BUCA RAMANGA

PROJECT:  
TRANSFEMORAL MECHATRONIC PROSTHESIS  
 WITH MAGNETORHEOLOGICAL  
 COMPENSATION

DRAWN:  
ZULY ALEXANDRA MORA PEREZ  
 SEBASTIAN MUÑOZ VASQUEZ

UNITS: mm  
 SCALE: 1:2  
 DATE: 29/09/2020  
 DWG. NO. 10/11  
 QUANTITY: 1  
 SHEET 1 OF 1

A4

Printing parameters:  
 Printed on Markforged Two®  
 Matrix: Onyx®  
 Reinforcement: carbon fiber  
 Infill: 100% solid  
 Fiber orientation: concentric  
 Fiber volume fraction: 32%

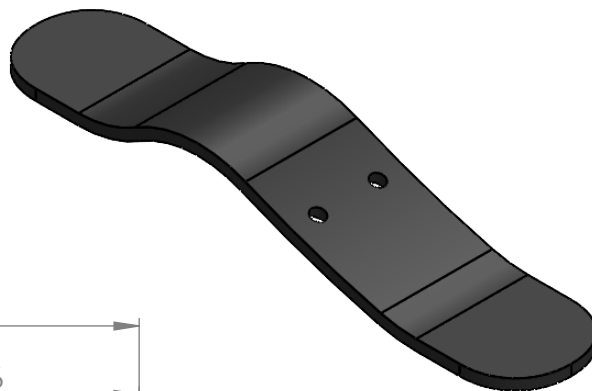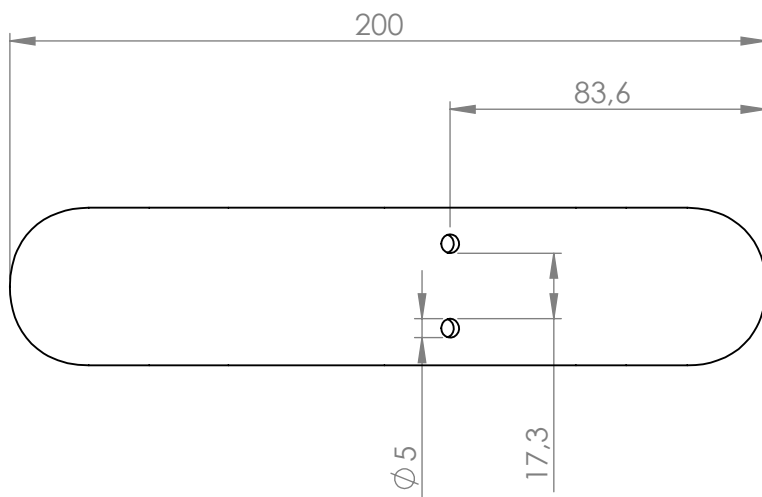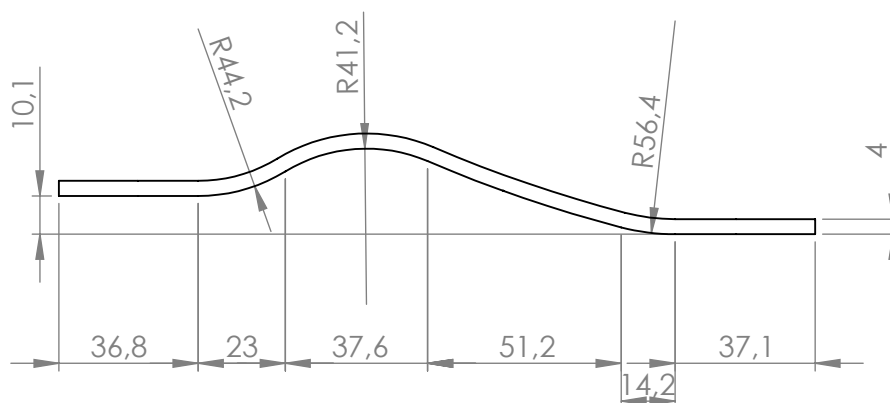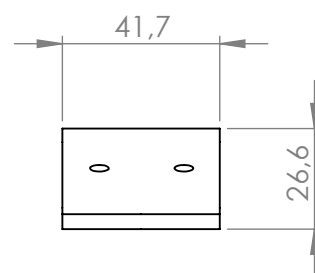

TITLE:

Insole

MASS:

39.40 g

MATERIAL:

Onyx



UNIVERSIDAD SANTO TOMÁS  
 PRIMER CENAFI SEDE CENTRO ESTUDIOS DE COLOMBIA  
 BUCA RAMANGA

PROJECT:

TRANSFEMORAL MECHATRONIC PROSTHESIS  
 WITH MAGNETORHEOLOGICAL  
 COMPENSATION

DRAWN:

ZULY ALEXANDRA MORA PEREZ  
 SEBASTIAN MUÑOZ VASQUEZ

UNITS: mm

SCALE: 1:2

DATE: 29/09/2020

DWG. NO. 11/11

QUANTITY: 1

SHEET 1 OF 1

A4
